# Supplementary material for: Structure-directed growth of high conductivity PEDOT from liquid-like oxidant layers during vacuum vapor phase polymerization
Source: Royal Society of Chemistry journal article supplement (doi:10.1039/c2jm32281a), 2012-01-01
Supplement: c2jm32281a.pdf [file c2jm32281a.pdf]

## SUPPORTING INFORMATION

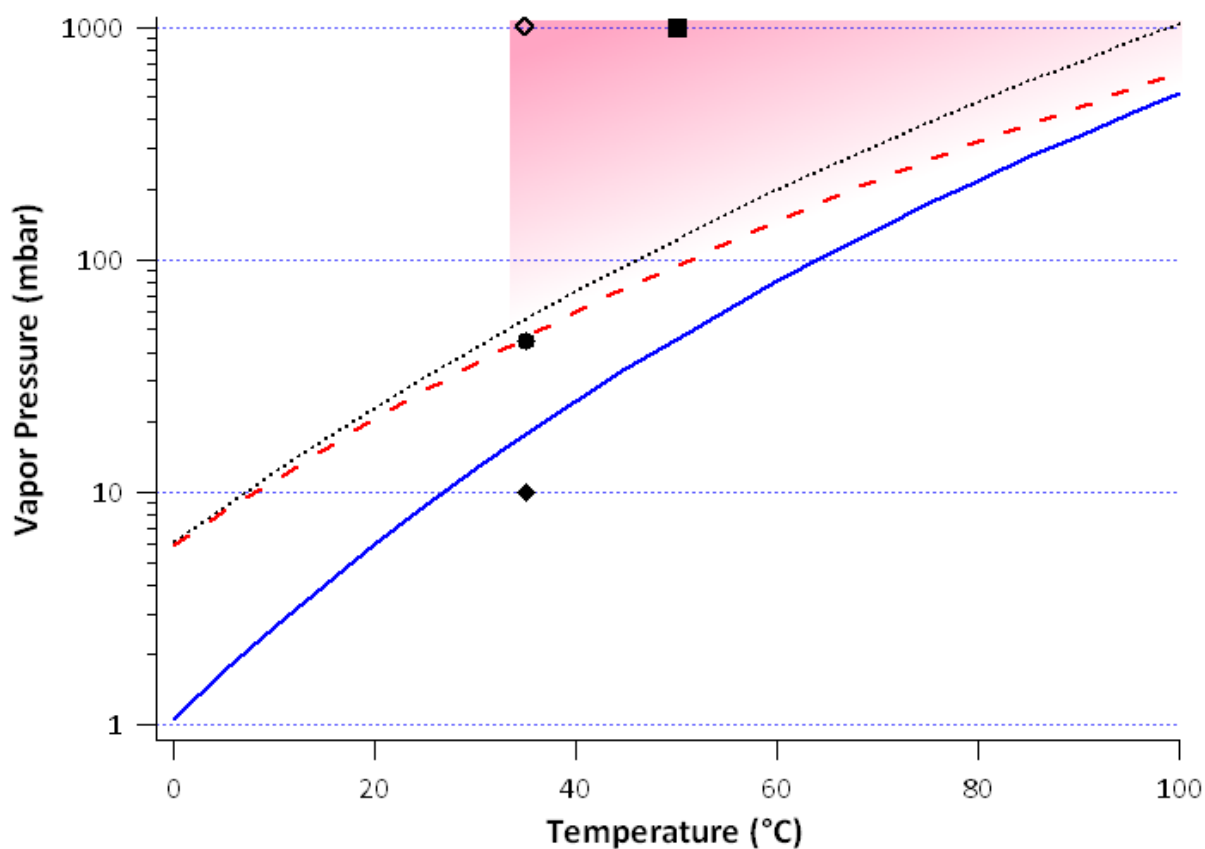

**Figure S1.** The calculated vapor pressures of water (dotted), pyridine (dashed), and n-butanol (solid) as a function of temperature. The shaded region illustrates the typical operating regime used for Vapor Phase Polymerization. Winther-Jensen *et al.* (■), Fabretto *et al.* (●), the present study (◆). The Fe(Tos)<sub>3</sub> plus pyridine oxidant (◇) from this study produced a stable PEDOT film using the atmospheric VPP.
